# Supplementary material
Source: MDPI journal article supplement (https://www.mdpi.com/2071-1050/15/14/11020)
Supplement: s1 [file s1]

**Journal: Sustainability**

**Title: Agroforestry as a Driver for the Provisioning of Peri-Urban Socio-Ecological Functions: A Trans-Disciplinary Approach**

**Authors:** Alice Giulia Dal Borgo<sup>1</sup>, Gemma Chiaffarelli<sup>2\*</sup>, Valentina Capocefalo<sup>1</sup>, Andrea Schievano<sup>3</sup>, Stefano Bocchi<sup>3</sup>, Ilda Vagge<sup>2</sup>

<sup>1</sup> Department of Heritage and Environment, University of Milan, 20122 Milan, Italy

<sup>2</sup> Department of Agriculture and Environmental Sciences, University of Milan, 20122 Milan, Italy

<sup>3</sup> Department of Environmental Science and Policy, University of Milan, 20122 Milan, Italy

**Correspondence:** [gemma.chiaffarelli@unimi.it](mailto:gemma.chiaffarelli@unimi.it)

## Supplementary materials

**Table S1** Extra-local scale landscape eco-mosaic patches entry-level data.

| EXTRA-LOCAL SCALE                                                   | Surface<br>(ha) | Perimeter<br>(m) | N.º<br>patches |
|---------------------------------------------------------------------|-----------------|------------------|----------------|
| LAND USE TYPE                                                       | ai              | pi               | NP             |
| <b>NAT</b>                                                          |                 |                  |                |
| Abandoned uncultivated area (spontaneous tree-shrub recolonization) | 52.22           | 30026            | 47             |
| Small woody area or woody strip (planted)                           | 25.78           | 12522            | 16             |
| Small woody area or woody strip (spontaneous recolonization)        | 32.00           | 18798            | 26             |
| Uncultivated area                                                   | 26.54           | 13513            | 30             |
| Young reforestation area                                            | 25.50           | 9782             | 15             |
| <b>TOT</b>                                                          | <b>162.03</b>   | <b>84641</b>     | <b>134</b>     |
| <b>AGR</b>                                                          |                 |                  |                |
| Agroforestry system                                                 | 3.16            | 1032             | 2              |
| Cropfield                                                           | 834.43          | 181097           | 209            |
| Grassland with trees and arboriculture                              | 5.73            | 2097             | 4              |
| Horticulture                                                        | 10.48           | 7031             | 19             |
| Orchard                                                             | 3.46            | 1794             | 6              |
| Permanent grassland                                                 | 116.22          | 36170            | 57             |
| Ricefield                                                           | 123.74          | 30061            | 38             |
| <b>TOT</b>                                                          | <b>1097.22</b>  | <b>259282</b>    | <b>335</b>     |
| <b>HYD</b>                                                          |                 |                  |                |
| Water basin and irrigation ditch                                    | 56.02           | 44701            | 5              |
| <b>TOT</b>                                                          | <b>56.02</b>    | <b>44701</b>     | <b>5</b>       |
| <b>ANT</b>                                                          |                 |                  |                |
| Abandoned area                                                      | 21.62           | 3863             | 4              |
| Dump, construction site, quarry                                     | 14.37           | 6271             | 9              |
| Agricultural building                                               | 3.86            | 1738             | 5              |
| Industrial or commercial building or services                       | 450.76          | 100447           | 145            |
| Railway, street, parking                                            | 151.05          | 108787           | 32             |
| Residential building                                                | 241.39          | 89137            | 159            |
| Urban Park and private green area                                   | 175.07          | 99477            | 198            |
| <b>TOT</b>                                                          | <b>1058.12</b>  | <b>409718</b>    | <b>552</b>     |
| <b>overall TOTAL</b>                                                | <b>2373.39</b>  | <b>798343</b>    | <b>1026</b>    |

**Table S2** Local scale landscape eco-mosaic CS and TS patches entry-level data.

| LOCAL SCALE                                                                                  | CS           |                |             | TS           |                |             |
|----------------------------------------------------------------------------------------------|--------------|----------------|-------------|--------------|----------------|-------------|
|                                                                                              | Surface (ha) | Perimeter (m)  | N.° patches | Surface (ha) | Perimeter (m)  | N.° patches |
| LAND USE TYPE                                                                                | ai           | pi             | NP          | ai           | pi             | NP          |
| <b>NAT</b>                                                                                   |              |                |             |              |                |             |
| Woody area from spontaneous colonization (allochthonous species dominant)                    | 0.88         | 717.8          | 2           | -            | -              | -           |
| Woody strip ecological improvement                                                           | -            | -              | -           | 1.82         | 1931           | 5           |
| Phytoremediation woody area                                                                  | -            | -              | -           | 3.95         | 2194           | 7           |
| Buffering/filtering woody strip                                                              | -            | -              | -           | 2.84         | 2005           | 2           |
| Abandoned uncultivated area                                                                  | 3.45         | 1517.15        | 4           | -            | -              | -           |
| Marginal grass strip                                                                         | 3.42         | 10870.29       | 28          | 2.68         | 7674           | 24          |
| Young reforestation area (1-2 yrs)                                                           | 2.97         | 2383.4         | 3           | -            | -              | -           |
| Young reforestation area (5 yrs)                                                             | 10.75        | 4285.11        | 8           | -            | -              | -           |
| Young reforestation area (15 yrs)                                                            | -            | -              | -           | 12.29        | 5476           | 10          |
| Hygrophilous reforestation area (serial patches techniques) (10 yrs)                         | -            | -              | -           | 1.17         | 807            | 1           |
| Mesophilous reforestation area (serial patches techniques) (10 yrs)                          | -            | -              | -           | 0.89         | 673            | 3           |
| Grassland with trees                                                                         | 3.68         | 2504.52        | 5           | 3.13         | 2084           | 3           |
| Spontaneous tree-shrub hedgerow (allochthonous species dominant)                             | 0.55         | 1211.66        | 5           | -            | -              | -           |
| Discontinuous spontaneous tree-shrub hedgerow (allochthonous species dominant)               | 1.51         | 3587.12        | 10          | -            | -              | -           |
| Planted hygrophilous tree-shrub hedgerow                                                     | 0.32         | 820.51         | 1           | 0.43         | 1184           | 3           |
| Planted mesophilous tree-shrub hedgerow                                                      | 0.37         | 860.12         | 2           | 1.90         | 5194           | 15          |
| Hygrophilous shrub hedgerow                                                                  | -            | -              | -           | 0.25         | 965            | 3           |
| Mesophilous shrub hedgerow                                                                   | -            | -              | -           | 0.78         | 2367           | 11          |
| Discontinuous spontaneous tree-shrub coenosis (allochthonous species dominant)               | 0.58         | 1541.21        | 5           | -            | -              | -           |
| Spontaneous tree-shrub coenosis along ditches (allochthonous species dominant)               | 0.37         | 946.06         | 5           | -            | -              | -           |
| Discontinuous spontaneous tree-shrub coenosis along ditches (allochthonous species dominant) | 1.6          | 4631.66        | 11          | -            | -              | -           |
| Hygrophilous tree-shrub hedgerow ecological improvement                                      | -            | -              | -           | 2.14         | 5851           | 18          |
| Spontaneous herbaceous coenosis along ditches (allochthonous species dominant)               | 1.51         | 3808.09        | 7           | -            | -              | -           |
| Spontaneous herbaceous-shrub coenosis along ditches (allochthonous species dominant)         | 0.18         | 435.16         | 1           | -            | -              | -           |
| Hygrophilous shrub hedgerow ecological improvement                                           | -            | -              | -           | 1.46         | 4825           | 8           |
| <b>TOT</b>                                                                                   | <b>32.14</b> | <b>40119.9</b> | <b>97</b>   | <b>35.7</b>  | <b>43229.1</b> | <b>113</b>  |
| <b>AGR</b>                                                                                   |              |                |             |              |                |             |
| Uncultivated area                                                                            | 21.83        | 7723.08        | 17          | -            | -              | -           |
| Urban vegetable garden                                                                       | 2.14         | 2400.54        | 9           | 2.44         | 2629           | 10          |
| Productive horticulture                                                                      | 0.82         | 644.67         | 3           | 0.82         | 645            | 3           |
| Glasshouse productive horticulture                                                           | 0.5          | 403.53         | 2           | 0.51         | 406            | 2           |
| Farm green facilities                                                                        | 0.13         | 322.9          | 2           | 0.13         | 323            | 2           |
| Permanent polyphyte grassland                                                                | 4.33         | 2260.25        | 4           | 1.06         | 1231           | 5           |
| Cropfield                                                                                    | 16.7         | 4432.3         | 7           | -            | -              | -           |
| Highly diversified cropfield                                                                 | -            | -              | -           | 20.45        | 8567           | 18          |
| Multi-strata agroforestry system (3 yrs)                                                     | 2.22         | 856.25         | 2           | -            | -              | -           |
| Multi-strata agroforestry system (8 yrs)                                                     | -            | -              | -           | 9.21         | 3468           | 7           |
| Multi-strata agroforestry system (11-13 yrs)                                                 | -            | -              | -           | 2.22         | 856            | 2           |
| Alley-cropping agroforestry system                                                           | -            | -              | -           | 9.25         | 4068           | 9           |

|                                      |                      |              |                |            |              |                |            |
|--------------------------------------|----------------------|--------------|----------------|------------|--------------|----------------|------------|
|                                      | <b>TOT</b>           | <b>48.67</b> | <b>19043.5</b> | <b>46</b>  | <b>46.1</b>  | <b>22191.3</b> | <b>58</b>  |
| <b>HYD</b>                           |                      |              |                |            |              |                |            |
| Channel and small irrigation ditches |                      | 1.1950       | 7475.06        | 2          | 1.20         | 7475           | 2          |
| Wetland                              |                      | -            | -              | -          | 0.30         | 266            | 1          |
| Re-activated natural spring          |                      | -            | -              | -          | 0.05         | 117            | 1          |
|                                      | <b>TOT</b>           | <b>1.195</b> | <b>7475.06</b> | <b>2</b>   | <b>1.545</b> | <b>7857.99</b> | <b>4</b>   |
| <b>ANT</b>                           |                      |              |                |            |              |                |            |
| Construction site                    |                      | 0.25         | 343.27         | 1          | 0.25         | 343            | 1          |
| Abandoned farmhouse                  |                      | 0.55         | 1019.5         | 7          | 0.55         | 1020           | 7          |
| Cultural religious centre            |                      | 0.16         | 163.53         | 1          | 1.43         | 619            | 2          |
| Abandoned courtyard                  |                      | 0.4          | 419.34         | 1          | 0.40         | 419            | 1          |
| Illegal dump                         |                      | 1.28         | 1480.61        | 7          | -            | -              | -          |
| Abandoned building                   |                      | 1.67         | 1174.85        | 5          | 0.40         | 719            | 4          |
| Productive building                  |                      | 0.2          | 188.32         | 1          | 0.20         | 188            | 1          |
| Residential building                 |                      | 4.51         | 5274.51        | 25         | 4.51         | 5275           | 25         |
| School building                      |                      | 1.37         | 576.58         | 1          | 1.37         | 577            | 1          |
| Parking                              |                      | 2.36         | 2179.14        | 8          | 2.36         | 2179           | 8          |
| Parking with trees                   |                      | 0.49         | 308.65         | 1          | 0.49         | 309            | 1          |
| Urban Park                           |                      | 4.41         | 2033.06        | 5          | 4.41         | 2033           | 5          |
| Public access meadow                 |                      | 0.31         | 154.2          | 1          | 0.30         | 384            | 2          |
| Power station hub                    |                      | 0.97         | 390.57         | 1          | 0.97         | 391            | 1          |
| Social nursery                       |                      | 0.03         | 67.8           | 1          | 0.03         | 68             | 1          |
| Private green area                   |                      | 11.32        | 9968.77        | 27         | 11.32        | 9969           | 27         |
| Abandoned private green area         |                      | 1.31         | 1219.52        | 5          | 1.31         | 1220           | 5          |
|                                      | <b>TOT</b>           | <b>31.59</b> | <b>26962.2</b> | <b>98</b>  | <b>30.3</b>  | <b>25711.8</b> | <b>92</b>  |
|                                      | <b>overall TOTAL</b> | <b>114</b>   | <b>93601</b>   | <b>243</b> | <b>114</b>   | <b>98990</b>   | <b>267</b> |
